1  
2  
3  
4  
5  
6  
7  
8  
9  
10  
11  
12  
13  
14  
15  
16  
17  
18  
19  
20  
21

**Model-guided design of mammalian genetic programs**

Joseph J. Muldoon<sup>1,2</sup>, Viswajit Kandula<sup>3</sup>, Mihe Hong<sup>2</sup>, Patrick S. Donahue<sup>1,2,4</sup>, Jonathan D. Boucher<sup>1,2</sup>,  
Neda Bagheri<sup>1,2,5,6</sup>, Joshua N. Leonard<sup>1,2,5\*</sup>

<sup>1</sup>Interdisciplinary Biological Sciences Program, Northwestern University, Evanston, IL 60208, USA.

<sup>2</sup>Department of Chemical and Biological Engineering, Northwestern University, Evanston, IL 60208, USA.

<sup>3</sup>Honors Program in Medical Education, Northwestern University Feinberg School of Medicine, Chicago, IL 60611, USA.

<sup>4</sup>Medical Scientist Training Program, Northwestern University Feinberg School of Medicine, Chicago, IL 60611, USA.

<sup>5</sup>Center for Synthetic Biology, Chemistry of Life Processes Institute, and Robert H. Lurie Comprehensive Cancer Center, Northwestern University, Evanston, IL 60208, USA.

<sup>6</sup>Departments of Biology and Chemical Engineering, University of Washington, Seattle, WA 98195, USA.

\*Corresponding author. Email: [j-leonard@northwestern.edu](mailto:j-leonard@northwestern.edu)

22 **ABSTRACT**

23

24 Genetically engineering cells to perform customizable functions is an emerging frontier with numerous  
25 technological and translational applications. However, it remains challenging to systematically engineer  
26 mammalian cells to execute complex functions. To address this need, we developed a method enabling  
27 accurate genetic program design using high-performing genetic parts and predictive computational models.  
28 We built multi-functional proteins integrating both transcriptional and post-translational control, validated  
29 models for describing these mechanisms, implemented digital and analog processing, and effectively linked  
30 genetic circuits with sensors for multi-input evaluations. The functional modularity and compositional  
31 versatility of these parts enable one to satisfy a given design objective via multiple synonymous programs.  
32 Our approach empowers bioengineers to predictively design mammalian cellular functions that perform as  
33 expected even at high levels of biological complexity.

34 Early demonstrations of genetically engineering customized functions in mammalian cells indicate a vast  
35 potential to benefit applications including directed stem cell differentiation (1, 2) and cancer immunotherapy  
36 (3). In general, most applications require precise control of gene expression and the capability to sense and  
37 respond to external cues (4-8). Despite the growing availability of biological *parts* (such as libraries of  
38 promoters and regulatory proteins) that could be used to control cell states, assembling parts to compose  
39 customized genetic programs that function as intended remains a challenge, and it often requires iterative  
40 experimental tuning or down-selection to identify functional configurations. This highly empirical process  
41 limits both the scope of programs that one can feasibly compose and fine-tune and likely the performance  
42 of functional programs identified in this manner. Thus, the need for systematic and precise design  
43 processes represents a grand challenge in the field of mammalian synthetic biology.

44  
45 Model-guided predictive design has been demonstrated in the composition of some cellular functions,  
46 including transcriptional logic in bacteria (9) as well as logical (10) and analog behaviors in yeast (11);  
47 however, this type of approach is less developed in mammalian systems. To date, transcription factors  
48 (TFs) based on zinc fingers (ZFs) (12, 13), transcription activator-like effectors (TALEs) (14-17), dCas9 (18,  
49 19), and other proteins (20) have been used to implement transcriptional logic in mammalian cells. Some  
50 of these studies make use of protein splicing (12, 14, 18). Other studies have used RNA-binding proteins  
51 (21), proteases (22, 23), and synthetic protein-binding domains (17). Yet, none of these approaches  
52 currently enable the customized design of sophisticated mammalian cellular functions and prediction of  
53 circuit performance based only upon descriptions of the component parts. Associated challenges include  
54 the availability of appropriate parts (24), suitably descriptive models that support predictions using these  
55 parts (25), and computational and conceptual tools that facilitate the identification of designs that function  
56 robustly despite biological variability and crosstalk (26-28). In this study, we sought to address these  
57 challenges by developing a model-driven process that enables one to propose a tractable set of candidate  
58 circuits for construction and testing without needing empirical trial-and-error tuning. We validated this  
59 framework by employing it to implement a variety of functions including digital and analog information  
60 processing, and sense-and-respond behaviors.

61

## 62 **Biological parts for integrating transcriptional and post-translational control of gene expression**

63

64 The strategy that we pursued for genetic program design was uniquely enabled by the COMposable  
65 Mammalian Elements of Transcription (COMET): a toolkit of TFs and promoters with tunable properties  
66 enabling precise and orthogonal control of gene expression (13). These TFs comprise a ZF DNA-binding  
67 domain and a functional domain, e.g., VP16 and VP64 are activation domains (AD) that with a ZF form an  
68 activator (ZFa). A protein including a ZF domain but lacking an AD functions as a competitive inhibitor of  
69 the cognate ZFa. Promoters in this library contain ZF binding sites arranged in different configurations (e.g.,  
70 ZF1x6-C has six compactly arranged ZF1 sites). Each combination of a promoter and a ZFa (and potentially  
71 an inhibitor) confers a characteristic level of transcriptional activity (**Fig. S1A–D**), and as part of this prior  
72 work, we developed mathematical models to characterize these relationships (13). Here, we investigate  
73 whether these biological parts and descriptive computational tools can be adapted and applied to achieve  
74 predictive genetic program design.

75

76 Although COMET includes many parts for implementing transcriptional regulation, we hypothesized that  
77 complex genetic program design would be facilitated by introducing a mechanism for regulation at the post-  
78 translational level (**Fig. 1A,B**). To investigate this strategy, we evaluated new parts based on split inteins:  
79 complementary domains that fold and *trans*-splice to covalently ligate flanking domains (exteins) (29). We  
80 selected the split intein gp41-1 for its rapid splicing kinetics (30). To test an application of this mechanism,  
81 we appended an AD to the gp41-1 N-terminal fragment (intN) and a ZF to the C-terminal fragment (intC).  
82 These parts were used to construct an AND gate in which a reporter gene was induced only when both  
83 fragments were present (**Fig. 1C, Fig. S1E**), demonstrating that COMET-mediated gene expression can  
84 be adapted with splicing. We next incorporated this mechanism into our modeling framework by modifying  
85 ordinary differential equations from the original study (13), which concisely represent transcriptional  
86 regulation (**Materials and Methods**), and fitting newly introduced parameters to the data (**Fig. S1F,G**). We  
87 extended the model to describe parts in which split inteins were fused onto two types of inhibitors (**Fig.**  
88 **S1H**): ZF, which competes with ZFa for binding site occupancy in the promoter; and ZF fused to DsRed-  
89 Express2 (abbreviated as DsRed-ZF), which also reduces the cooperativity of ZFa-mediated RNA

90 polymerase II (RNAPII) recruitment at multi-site promoters (13). Additionally, we introduced an R95K  
91 mutation to ablate the DsRed chromophore (31), yielding a non-fluorescent inhibitor we termed DsDed-ZF  
92 (**Fig. S1I**). The extended model accurately recapitulated the component dose-dependent performance of  
93 the AND gate (**Fig. 1C**), providing verification that this extension can describe split intein-based circuits.

94

### 95 **Model-guided design of genetic programs**

96

97 As a first test of the predictive capacity of the revised model, we simulated a panel of circuits that we  
98 hypothesized could carry out various logic operations (**Fig. S1J**). Our objective was to identify promising  
99 designs for specific functions, so we opted not to include additional model complexity that might be required  
100 to predict all aspects of circuit behavior (e.g., potential cell burden effects). Throughout, simulations  
101 employed a statistical model for gene expression variation, which we have previously shown to be important  
102 in accounting for the effect of cellular variation on how an engineered function is carried out across a cell  
103 population (13, 32) (**Materials and Methods, Fig. S1G**). From the panel, we selected several designs to  
104 test. First, to make an IMPLY gate, the AND gate was modified by appending DsDed to intC-ZF1 and co-  
105 expressing a VP64-ZF1 activator. Experimental outcomes (i.e., reporter readout across component doses)  
106 were consistent with the prediction that readout would be low only with DsDed-intC-ZF1 present in sufficient  
107 excess over its VP64-intN splicing partner to function as an inhibitor (**Fig. 1D**). To make a NAND gate, a  
108 DsDed-ZF1 inhibitor was split into DsDed-intN and intC-ZF1 and co-expressed with an activator. Outcomes  
109 were consistent with the prediction that readout would be low only with sufficient reconstitution of the  
110 inhibitor (**Fig. 1E**). These initial test cases demonstrate that model-guided design can identify effective  
111 topologies, as well as the precise relationship between input component levels and circuit output.

112

113 A versatile design framework would enable one to achieve a given performance objective via multiple  
114 circuits. We speculated that the combined properties of COMET and splicing-based extensions developed  
115 here might provide a sufficient basis for this capability. To investigate this possibility, we compared four  
116 designs for a NIMPLY gate, each of which utilizes a different mechanism (i.e., topology and/or choice of  
117 parts). The first two designs used inhibition mediated by ZF1 (**Fig. 1F**) or DsDed-ZF1 (**Fig. 1G**). The third

118 design used splicing of an VP64-intC-ZF1 activator to a DsDed-ZF1 inhibitor, such that the readout would  
119 be high only with VP64-intC-ZF1 in sufficient excess of its splicing partner DsDed-intN (**Fig. 1H**). The fourth  
120 design used a double inversion cascade, in which an upstream inhibitor prevented a downstream inhibitor  
121 from acting on the reporter (**Fig. 1I**); this scenario represents a variation on a topology that was previously  
122 examined in bacteria (33) and later in mammalian cells with dCas9-TFs (34). All four designs produced  
123 NIMPLY as predicted. We next tested whether splicing could be combined with a cascade, and indeed we  
124 were able to build an AND gate by splitting the cascade's upstream inhibitor into DsDed-intN and intC-ZF10  
125 (**Fig. 1J**). Unlike standard ZFa-mediated activation, this activation via double inversion exhibited  
126 ultrasensitivity (Hill coefficient  $n = 2.8$ )—a signal transformation in which a small change in input yields a  
127 large change in output, and high output is produced only with sufficient input (**Fig. 1K, Fig. S1K**).  
128 Ultrasensitivity buffered the circuit against low inputs, such that the output remained low for input levels that  
129 in the standard activation case would have produced half-maximal activation.

130

131 Across the panel, five of the eight gates exhibited a goodness of prediction metric (comparing all simulated  
132 and observed outcomes,  $Q^2$ ) of at least 90%, indicating a high capacity for predicting dose response  
133 landscapes that had not been used in model training (**Fig. S1N,O**). Even for the gate with the lowest  $Q^2$   
134 (IMPLY, **Fig. 1D, Fig. S1N**), the model correctly predicted the trend across most input dose combinations.  
135 Altogether, these results demonstrate the feasibility of model-guided design of logic gates in mammalian  
136 cells, and that the choice of parts and mechanism yields predictable performance characteristics.

137

### 138 **Compression of circuit design using functional modularity**

139

140 A putative advantage of orthogonal parts like COMET TFs and promoters is that these parts may be used  
141 together without disrupting their functions. However, simply appending modules can lead to inefficient and  
142 cumbersome designs, and thus, one focus of our approach was achieving genetic compactness as well as  
143 performance. Enhancing compactness could eliminate potential failure modes and reduce cargo size for  
144 gene delivery vehicles. Genetic compression—reducing the number of components for a given  
145 specification—has been investigated by using recombinase-mediated DNA rearrangement (35) and by

146 borrowing from a software engineering strategy to eliminate redundancy (36). Here, we sought to implement  
147 a previously unexplored form of *topological compaction* based on protein multi-tasking (**Fig. 2A**). We  
148 hypothesized that because our genetic parts operate through direct interactions without relying on long-  
149 range mechanisms such as chromatin modification, they might exhibit functional modularity, i.e., domains  
150 could be concatenated and retain their functions. This property would be of great utility by enabling the use  
151 of multi-tasking proteins to act at multiple promoters or in both transcriptional and post-translational roles,  
152 to execute multiple functions in an efficient fashion.

153

154 We investigated whether functional modularity could enable the design of compact multi-input multi-output  
155 (MIMO) systems. Ultimately, this capability could support the encoding of sophisticated decision-making  
156 strategies in which cells take different actions in different situations. As a base case, we simply appended  
157 a NIMPLY gate and a NOT gate in a non-compact manner, and the combination functioned as expected  
158 (**Fig. 2B, Fig. S2A**). This success demonstrates the potential for composite functions, but it brings no  
159 efficiency relative to the individual gates. To test topological compaction, first, an IF/NIMPLY gate was  
160 proposed in which VP64-ZF1-intC-ZF10 would act as a bispecific activator (on two promoters) and interact  
161 with an inert DsDed-intN to produce a VP64-ZF1-intC/intN activator and a DsDed-ZF10 inhibitor (**Fig. 2C,**  
162 **Fig. S2B**). The second gate, IF/AND, used an activator and an inhibitor to produce a bispecific activator  
163 and an inert protein, through essentially the inverse mechanism of that in the IF/NIMPLY gate (**Fig. 2D,**  
164 **Fig. S2C**). Third, a NIMPLY/AND gate used a VP64-intC-ZF1-DsDed activator and an intN-ZF10 inhibitor  
165 to invert their respective activities (**Fig. 2E, Fig. S2D**). We hypothesized that the former protein would act  
166 as an activator, in that DsDed would not preclude VP64 from conferring activation. Lastly, a  
167 NIMPLY/NIMPLY gate used two activators to produce a bifunctional inhibitor and an inert protein (**Fig. 2F,**  
168 **Fig. S2E**). We note that if this circuit had used the same readout for both reporters it would be a XOR gate.  
169 Overall, the model predictions explained most of the variance in experimental outcomes, and several cases  
170 were in close agreement ( $\geq 90\%$   $Q^2$ ) (**Fig. S2F,G**). Minor deviations are potentially attributable to effects  
171 such as differences in stability for different proteins; however, we chose not to incorporate such effects into  
172 the model because increasing model complexity could lead to overfitting. Moreover, the choice to simplify  
173 the description of protein stability did not preclude model-guided identification of high-performing designs.

174

175 Notably, when we examined performance at the single-cell level, some population-level outcomes were  
176 driven by subpopulations of cells. In some circuits, subpopulations induced one reporter or the other, but  
177 not both, and thus population outcomes were driven by shifts in subpopulation frequencies (**Fig. S2A,D,E**).  
178 In other circuits, this task distribution was not apparent (**Fig. S2B,C**). Although neither behavior was an  
179 explicitly designed feature, both types of behavior were predicted by simulations. Altogether, the gates  
180 described in **Figs. 1,2** span a wide range of logical complexity (the number and the layers of implicit gates  
181 depicted in the electronic diagrams) and genetic complexity (the number of genes, regulatory connections,  
182 and regulatory proteins) (**Fig. 2G**). The successful development of these circuits without the need for  
183 additional tuning demonstrates that this framework may be well-suited to overcoming complexity-  
184 associated barriers with mammalian genetic program design.

185

#### 186 **Implementation of analog signal processing**

187

188 Although digital logic has many uses, biology also processes analog signals for many purposes, and we  
189 next examined whether our tools could be employed in this way. The first property that we sought to  
190 implement was ultrasensitivity, which is desirable in engineering sharp activation (37, 38) and is observed  
191 in the natural control of processes including cell growth, division, and apoptosis (39). The second property  
192 was bandpass concentration filtering, in which an output is produced only when the input falls within a  
193 certain range of magnitudes (22, 40). Bandpass concentration filtering is salient for both natural and  
194 synthetic spatial patterning (41). To develop a strategy for implementing these properties, we made use of  
195 existing mechanistic insights. Previously, we determined that ZFa-mediated activation is cooperative at the  
196 level of transcription initiation, and in comparing promoter architectures, maximal transcription increased  
197 with the number and compactness of binding sites (13). This COMET promoter feature confers high  
198 inducibility as well as a high sensitivity to inhibition by proteins that compete for DNA binding. We also  
199 deduced that TF *binding* to promoter is generally non-cooperative, and transcriptional output from such  
200 promoters is not inherently ultrasensitive to ZFa dose ( $n = 1$ ). To construct systems that do exhibit  
201 ultrasensitivity ( $n > 1$ ), we examined several strategies in which the output is inhibited only at low activator



202 doses (**Fig. S3A–C**). The first design made use of the inhibition conferred by intC-ZF1 prior to splicing with  
203 a VP16-intN input (**Fig. S3B**). We reasoned that at low VP16-intN doses, intC-ZF-mediated inhibition would  
204 dominate, and at high doses, transactivation by reconstituted VP16-ZF would dominate. We also tested  
205 this concept with the addition of a DsDed-ZF to threshold the response by promoting relatively more  
206 inhibition at low input doses (**Fig. S3C**). However, the increase in ultrasensitivity was modest for these  
207 cases, apparently from insufficient inhibition at low activator doses due to decreased protein stability caused  
208 by appending the intC domain to the inhibitory ZF (**Fig. S1F**).

209  
210 Compared to a ZFa base case ( $n = 1.0$ ) (**Fig. 3A, Fig. S3D**), however, DsDed-ZF thresholding of ZFa-  
211 mediated activation did lead to an increase in the Hill coefficient ( $n = 1.9$ ) (**Fig. 3B, Fig. S3E**). This outcome  
212 led us to consider a vehicular analogy: the circuits with DsDed-ZF are akin to applying the brake (inhibition)  
213 while applying the accelerator (activation), but a more effective approach might be to release the brake as  
214 the accelerator is applied. To realize this concept and circumvent choices that modulate protein stability,  
215 we used a chemically responsive COMET TF (RaZFa) in which rapamycin-induced heterodimerization  
216 domains FRB and FKBP are fused to an AD and a ZF, respectively. In the presence of rapamycin (which  
217 in this scenario is not an input, but rather an environmental species), heterodimerization of VP16-FRB and  
218 FKBP-ZF converts FKBP-ZF (brake) into RaZFa (accelerator), which induces the reporter. With rapamycin,  
219 the response of this circuit to VP16-FRB input indeed exhibited greater ultrasensitivity ( $n = 3.3$ ), consistent  
220 with the prediction (**Fig. 3C, Fig. S3F**). Thus, in this system, ultrasensitivity can arise through cascades  
221 (**Fig. 1**) or reconstitution (**Fig. 3**), and neither mechanism requires the cooperativity in TF-DNA binding that  
222 is often associated with ultrasensitive responses.

223  
224 We next investigated circuits to implement bandpass concentration filtering. Our strategy was to use  
225 mechanisms that inhibit reporter output only at high doses of activator input, and the predictions were based  
226 on a fitted ZFa base case (**Fig. 3D, Fig. S3G**). We hypothesized that although FKBP-ZF is necessary for  
227 RaZFa-mediated activation, excess FKBP-ZF would be inhibitory. We confirmed that FKBP-ZF acted as an  
228 inhibitor (**Fig. 3E, Fig. S3H**), and we implemented an RaZFa test circuit; the response to FKBP-ZF input  
229 showed a peak in output, but no sharp upper threshold, as predicted (**Fig. 3F, Fig. S3I**). Based on these

230 results, we designed a new topology to achieve a sharper bandpass. Of the regulation within this design,  
231 the two paths of negative regulation from FKBP-ZF (and not the positive feedback from RaZFa) appeared  
232 to be most important for sharpening the bandpass (**Fig. S3M**). For the primary input to the bandpass, FKBP-  
233 ZF, we expected that at zero dose, there would be no activation; at moderate doses, there would be  
234 activation; and at high doses, excess FKBP-ZF would both decrease reconstitution (by inhibiting induction  
235 of VP16-FRB) and inhibit the reporter. The experimental outcomes closely matched the prediction of a  
236 bandpass with a sharp upper threshold (**Fig. 3G, Fig. S3J**). Furthermore, when VP16-ZF or VP16-FRB  
237 doses were varied, the responses were activating as predicted (**Fig. 3H–I, Fig. S3K–L**), demonstrating a  
238 predictive capacity across multiple inputs for the system. These results demonstrate that our parts and  
239 approach are suitable for designing analog behaviors, as well as digital logic gates.

240

#### 241 **Integration of genetic circuits with sensors to build sense-and-respond functions**

242

243 While the predictive design of genetic programs is a substantial technical advance, employing this capability  
244 to enable many potential applications will require integrating genetic circuits with native or synthetic parts  
245 that sense and modulate the state of the cell or its environment. A recurring challenge associated with this  
246 goal is level-matching the output of a sensor to the input requirements of a downstream circuit (32, 42). We  
247 investigated whether our designed circuits could overcome this challenge and be effectively linked to  
248 sensors without requiring laborious trial-and-error tuning. Simulations suggested that adding an upstream  
249 layer of signal processing (i.e., for sensing) should be feasible, since in the model, ZFa can be arranged in  
250 series without prohibitively driving up background or dampening induced signal (**Fig. S4A**).

251

252 We considered two classes of synthetic sensors (intracellular and transmembrane) for which we  
253 hypothesized that signaling (i.e., sensor output) could be coupled to COMET-based circuits. For the  
254 intracellular sensor, we built a new TF—ABA-ZFa, which is analogous to RaZFa—by fusing the abscisic  
255 acid (ABA)-binding domains PYL1 and ABI1 (43) to an AD and a ZF, respectively. For transmembrane  
256 sensing, we selected the modular extracellular sensor architecture (MESA)—a self-contained receptor and  
257 signal transduction system that transduces ligand binding into orthogonal regulation of target genes (44,

258 45). In this mechanism, ligand-mediated dimerization of two transmembrane proteins called the target chain  
259 (TC) and protease chain (PC) promotes PC-mediated proteolytic *trans*-cleavage of a TC-bound TF. We  
260 explored several strategies for building COMET-compatible MESA based on a recently reported improved  
261 MESA design (46) and the parts developed in the current study (**Fig. S4B–G**). The best performance was  
262 observed using rapalog-inducible COMET-MESA that release either ZFa for activating signaling or DsDed-  
263 ZF for inhibitory signaling (the latter represents a new function for MESA receptors) (**Fig. S4G**); the ZFa-  
264 releasing COMET-MESA receptor was carried forward. We observed that both sensors displayed excellent  
265 performance in terms of reporter induction upon ligand treatment (**Fig. 4A,B**). For ABA-ZF2a (ZF2a was  
266 selected for its potency stemming from cooperative transcriptional activation (13)), ligand-independent  
267 signal was unobservable, and induced signal was high, yielding perfect performance (**Fig. 4A**). For Rapa-  
268 MESA-ZF6a (ZF6a was also selected for its potency), the ligand-inducible fold difference in signal was  
269 ~200x (**Fig. 4B**), which is several fold higher than was observed for recently reported receptors based on  
270 tTA (46), and also higher than the fold difference observed for a high-performing MESA that employs a  
271 distinct mechanism (47). Thus, Rapa-MESA-ZF6a is the highest performing MESA reported to date. Both  
272 sensors have a low off state and a high on state, apparently benefitting from the advantageous property of  
273 COMET promoter-based cooperativity.

274

275 We carried forward the two validated sensors and examined whether downstream circuits comprising  
276 genetic parts and designed topologies from this study could be seamlessly linked with the new input layer.  
277 To this end, we designed a panel of four synonymous topologies that implement AND logic through different  
278 mechanisms (**Fig. 4C**): 1) a hybrid promoter with alternating TF sites (based on a similar architecture from  
279 the original COMET study (13)), 2) splicing (as in **Fig. 1C**), 3) splicing with DsDed (as in **Figs. 1D, 2D** for  
280 tighter inhibition), and 4) and splicing with feedback (as in **Fig. 3G–I**). All four topologies exhibited AND  
281 behavior when tested using ZFa as inputs (**Fig. 4D**), demonstrating the versatility for attaining a given  
282 objective in multiple ways. Moreover, when coupled to ligand-activated sensors, these circuits still conferred  
283 AND behavior, and performance was maintained (i.e., fold induction with two ligands remained much  
284 greater than with each ligand individually) in carrying out this more complex sensing function (**Fig. 4E**). A  
285 comparison across the designs provides some insights. The hybrid promoter in topology 1 was high-

286 performing, and the splicing topologies in 2–4 generally yielded improvement over 1, despite the additional  
287 regulatory layer, by reducing the output generated from either single input alone to near reporter-only  
288 background (**Fig. S4H**, shown with linear scaling). Of the topologies examined, 2 and 3 were the most  
289 effective at producing a high output when both inputs were present and low output when either input was  
290 present alone. These results demonstrate that genetic programs can be designed by a predictive model-  
291 driven process, and then these programs can be readily linked to different classes of sensors to implement  
292 high-performing sensing and processing functions.

293

## 294 **Discussion**

295

296 We developed an approach for accurate genetic program design by engineering new parts that combine  
297 transcriptional and post-translational control and validating a computational modeling framework. The  
298 experimental observations closely matched simulations, even in scenarios employing new proteins  
299 (including those with many domains) and new topologies (including those with many interacting parts),  
300 demonstrating a high predictive capacity across a range of complexity (**Fig. 2G**). Since the mechanisms  
301 employed for binding, splicing, activation, and inhibition can be described by concise formalisms (**Materials**  
302 **and Methods**), no fundamental revamping (i.e., changing the underlying representation or granularity) of  
303 our original descriptive model was needed to enable predictions. Furthermore, no trial-and-error (e.g.,  
304 empirical tuning of designs or substitution of parts) was needed to arrive at the specified design goals,  
305 which streamlined the design-build-test-learn cycle. We understand this to be possible because once the  
306 base case parts were characterized, no additional parameterization was needed to simulate how the parts  
307 would function when combined in new designs. Lastly, even though a relatively small set of protein domains  
308 was utilized, we were able to combine the domains in many ways; a concise library was sufficient to produce  
309 the wide variety of behaviors observed.

310

311 This study benefited from insights that could facilitate future genetic circuit design efforts. Key strategies  
312 that enabled sophisticated design included the use of antagonistic bifunctionality (48), in which a component  
313 can exert opposing effects on a target gene depending on the other components in the circuit (**Fig. S4I**),

314 and functional modularity, which enabled multiple activities to be combined in individual proteins (**Fig. S4J**).  
315 Sophisticated design was also enabled through the use of split genetic parts, including those that splice or  
316 dimerize. Split parts are conducive to encoding both digital (**Figs. 1,2**) and analog (**Fig. 3**) functions. Split  
317 parts also shift some of the regulation from the transcriptional level to the post-translational level (i.e.,  
318 protein-protein interactions), which could increase the speed of signal processing. Another benefit of split  
319 parts relates to circumventing cargo limitations of gene delivery vehicles, in that a large program that does  
320 not fit in one vector could be distributed across multiple vectors (49), in such a way that the parts interact  
321 to reconstitute the program only in cells receiving all of the vectors. Finally, we found that seamless level-  
322 matching could be achieved with multi-layer circuits due to the potency of COMET TFs at cognate  
323 promoters, and in particular, the fusion of such a TF onto MESA resulted in the highest-performing version  
324 of this receptor to date (**Fig. 4B,E**).

325

326 Altogether, these attributes and insights, in combination with the many ways in which components can be  
327 arranged to regulate each other, greatly expand the mammalian genetic program design space. In our  
328 current system, one can propose and formulate models for candidate designs based on principles for how  
329 the functionally modular parts operate (**Materials and Methods**) and then evaluate in silico outcomes. In  
330 the future, it should be possible to further automate this process by using software to sweep large  
331 combinatorial spaces and identify candidates that satisfy specified performance objectives. Such advances  
332 could further speed up the design process and broaden the scope of possible circuits and behaviors beyond  
333 those accessible solely by intuition. The new components and quantitative approaches developed here  
334 should enable bioengineers to build customized cellular functions for applications ranging from fundamental  
335 research to biotechnology and medicine.

336 **ACKNOWLEDGEMENTS**

337 We acknowledge the services of the Northwestern University (NU) Flow Cytometry Core Facility and  
338 NUSeq Core Facility. We thank Taylor Dolberg for assistance with experiments; Katelyn Dray, Tae-Eun  
339 Kim, Joseph Draut, and Siyuan Feng for some of the cloning in this study; Katelyn Dray, Everett Allchin,  
340 and Christopher Coleman for collaboration on the computational models; and members of the Leonard Lab  
341 and Bagheri Lab for helpful discussions. **Funding:** This work was supported in part by the National Institute  
342 of Biomedical Imaging and Bioengineering through award number 1R01EB026510, the National Institute  
343 of General Medical Sciences through award number T32GM008152 (to Hossein Ardehali), the National  
344 Cancer Institute through award number F30CA203325, the NU Flow Cytometry Core Facility supported by  
345 a Cancer Center Support Grant (NCI 5P30CA060553), the NUSeq Core of the Northwestern Center for  
346 Genetic Medicine, a NU Chemistry of Life Processes Chicago Area Undergraduate Research Symposium  
347 award (to V.K.), and a NU Undergraduate Research Grant (to M.H.). **Author contributions:**  
348 Conceptualization, J.J.M., V.K., M.H., P.S.D., J.N.L.; Methodology, J.J.M., V.K., M.H., P.S.D., J.D.B.;  
349 Software, J.J.M., M.H., J.D.B.; Validation, J.J.M., V.K., P.S.D., J.D.B.; Formal Analysis, J.J.M., M.H.;  
350 Investigation, J.J.M., V.K., M.H., P.S.D., J.D.B.; Resources, J.J.M., V.K., M.H., P.S.D., J.D.B., J.N.L.; Data  
351 Curation, J.J.M.; Writing – Original Draft, J.J.M., J.N.L.; Writing – Review & Editing, J.J.M., V.K., M.H.,  
352 P.S.D., J.D.B., N.B., J.N.L.; Visualization, J.J.M.; Supervision, N.B., J.N.L.; Project Administration, J.J.M.,  
353 J.N.L.; Funding Acquisition, J.J.M., V.K., M.H., P.S.D., N.B., J.N.L. **Competing interests:** J.N.L. is an  
354 inventor on related intellectual property: United States Patent 9,732,392; WO2013022739. P.S.D., J.J.M.  
355 and J.N.L. are co-inventors on patent-pending intellectual property. **Data and materials availability:**  
356 Plasmid maps are provided as supplementary material, and plasmids will be made available through  
357 Addgene. Code is provided as supplementary material and at  
358 <https://github.com/leonardlab/GeneticPrograms> under an open source license (50). Source data are  
359 available as supplementary material and from the corresponding author upon reasonable request.

360 **SUPPLEMENTARY MATERIALS**

361 Materials and Methods, Figs. S1 to S4, Tables S1 to S2, References, Source\_data.xlsx, Source\_code.zip,  
362 Plasmid\_maps.zip

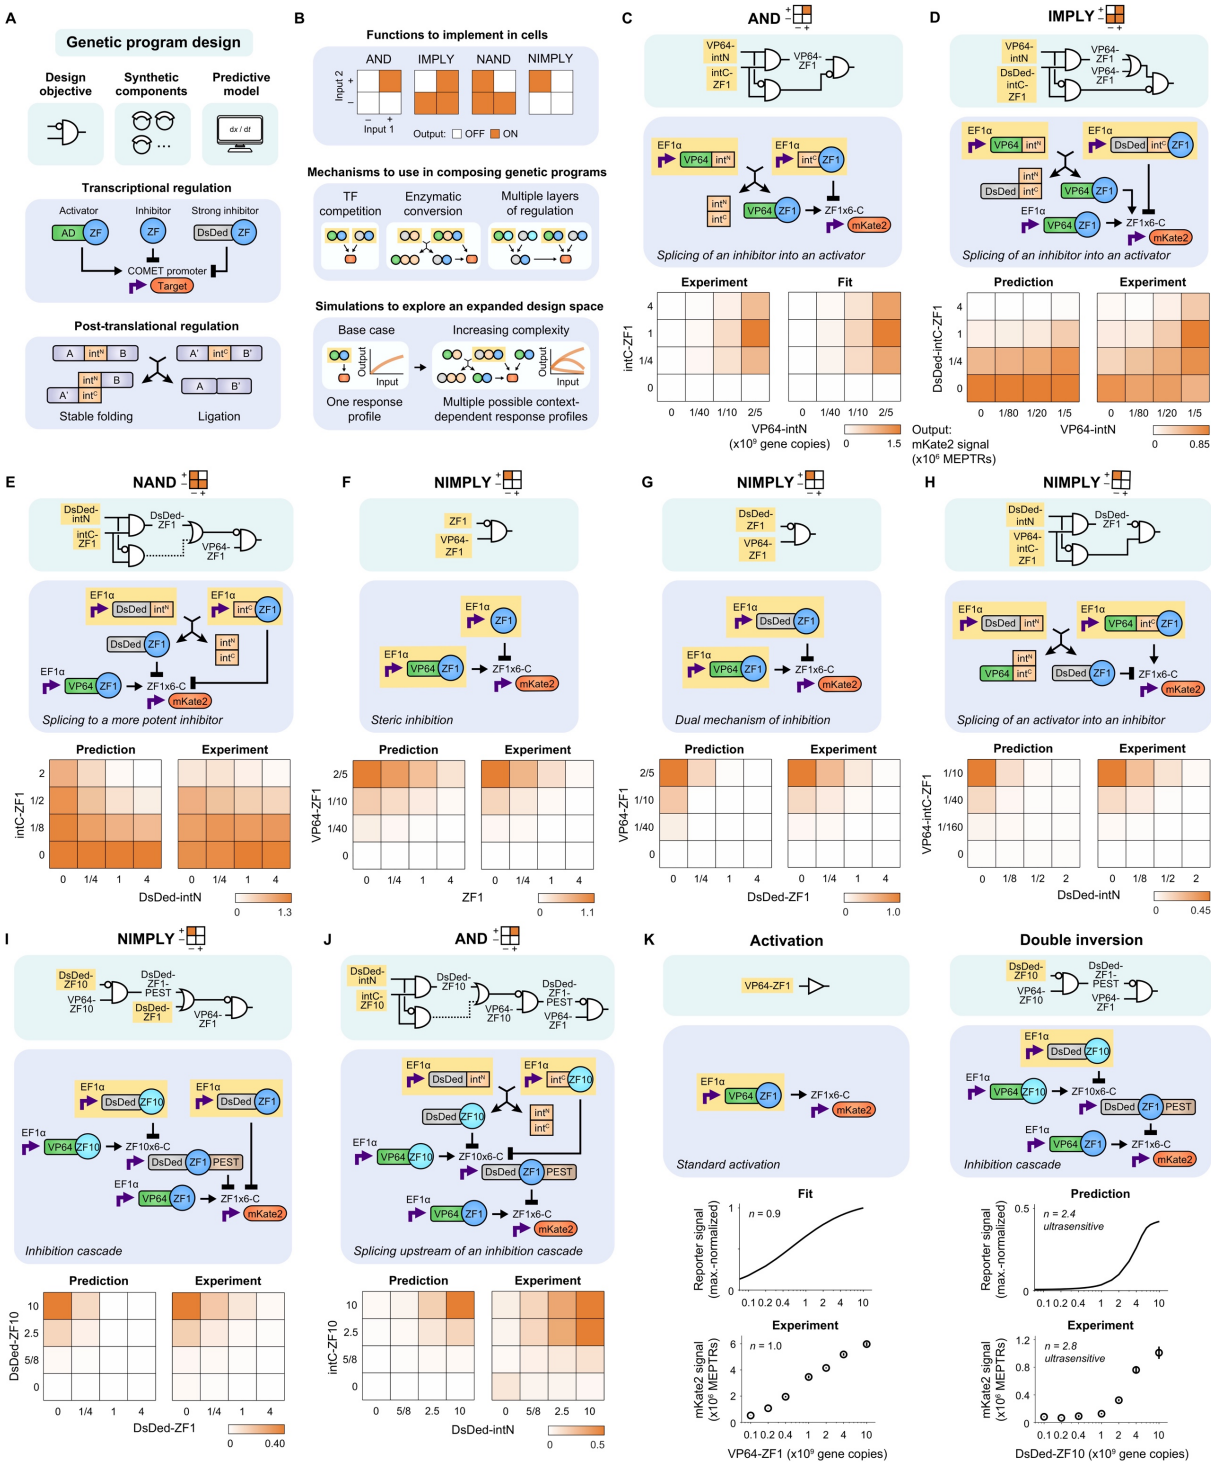



364 **Fig. 1. Logical evaluation is enabled by transcriptional and post-translational regulation. (A,B)**  
365 Cartoons depict **(A)** the genetic components and **(B)** their arrangement and use in simulations to produce  
366 intended functions. Transcription is mediated by COMET TFs, which here are modified with split inteins to  
367 incorporate post-translational regulation via splicing. Genetic parts that carry out specified activities and  
368 that can be described mathematically should enable the predictive customization of cellular functions. In  
369 the schematics, circles are protein domains, arrows indicate splicing or regulation, yellow highlighting  
370 denotes the inputs, and the red node is the output. **(C–J)** A panel of logic gates was designed, simulated,  
371 and experimentally evaluated. Synthetic digital logic in cells is inherently analog, and component doses  
372 were selected to examine this behavior and underscore particular features (e.g., in **C**, reporter signal  
373 decreases at a high intC-ZF1 dose because intC-ZF1 inhibits ZFa-mediated transcription). In the electronic  
374 diagrams (teal background), lines denote splicing or regulation. Processes that have a modest effect within  
375 the dose range examined, and that because of fundamentally analog behavior do not carry out a fully digital  
376 function, are denoted by dotted lines. In the mechanistic diagrams (blue background), purple bent arrows  
377 are promoters, and black arrows indicate splicing and regulation. Yellow highlighting denotes the  
378 components for which dose is varied (in gene copies). Simulation and experimental results are presented  
379 in heatmaps that indicate how the two inputs affect reporter output (mKate2 signal in MEPTRs); color-  
380 coding denotes the mean reporter signal from three biological replicates (bar graphs in **Fig. S1L**, histograms  
381 in **Fig. S1M**), scaled by the maximum value in each heatmap. Simulations in **C** are from a fit to the data,  
382 and subsequent panels **(D–J)** are predictions. **(K)** Some of the motifs that were used in the gate designs  
383 confer sharp transitions in reporter output. For example, a standard activation dose response was not  
384 ultrasensitive, but layering two inhibitors in a cascade did produce ultrasensitivity (Hill coefficient  $n > 1$ ).  
385 The downstream inhibitor is tagged with a PEST degron.



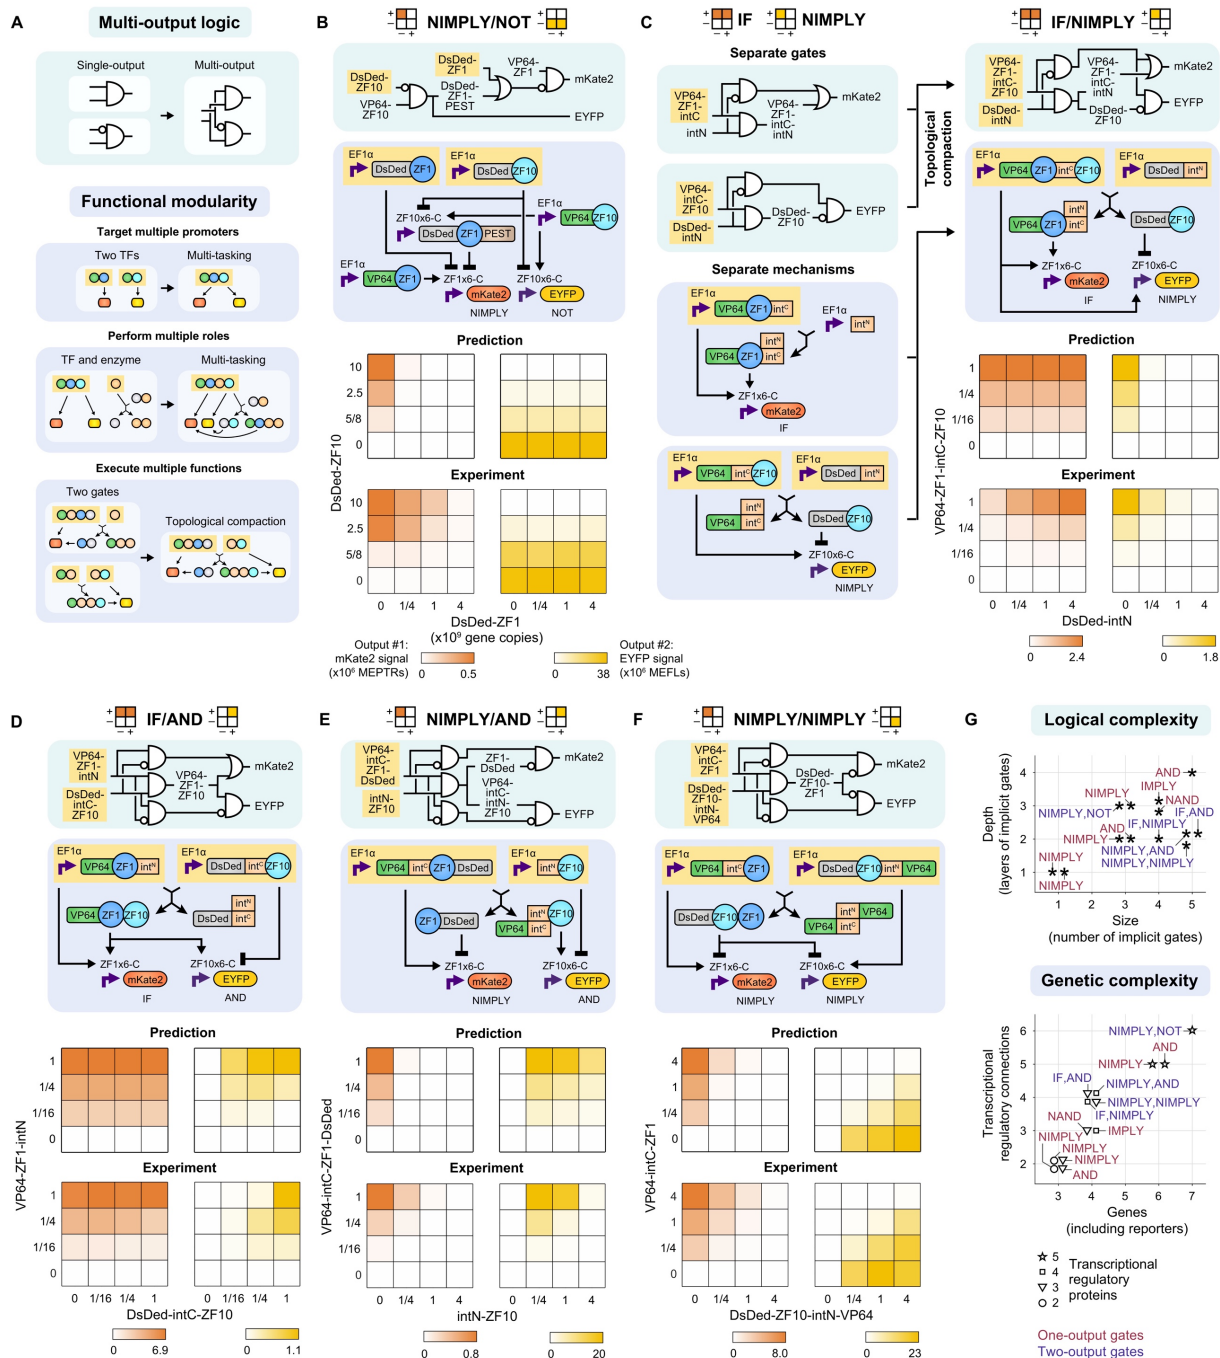

386

387 **Fig. 2. Compact multi-output logic is attained through functional modularity.** (A) A strategy for multi-  
388 output logic is proposed by using multi-tasking proteins that retain the functions of their constituent domains.  
389 The cartoons depict the use of multiple DNA-binding domains on a TF to regulate multiple genes, the  
390 embedding of a split intein fragment within a functioning TF to enzymatically alter its activity, and the  
391 merging of features from multiple genetic programs to enable their compact simultaneous implementation.  
392 (B–F) A panel of multi-input-multi-output gates was designed, simulated, and experimentally evaluated. As  
393 an example, C is deconstructed to show how separate topologies containing proteins that have some  
394 domains in common and are amenable to the appending of additional domains can be compressed. In the  
395 plots, color-coding denotes the mean mKate2 and EYFP reporter signal from three biological replicates  
396 (bar graphs in **Fig. S2F**), scaled by the maximum value in each heatmap. (G) These plots summarize the  
397 complexity of the gates that were designed and validated in **Fig. 1** (red) and **Fig. 2** (purple), with complexity  
398 defined based on the size and depth of the circuits in the electronic diagrams (upper) or based on the  
399 numbers of genes, regulatory connections, and regulatory proteins employed (lower). The expanded toolkit  
400 of genetic parts and model-guided approach were successful for building circuits spanning a range of  
401 attributes, which suggests that this design process could be executed reliably for many future objectives.

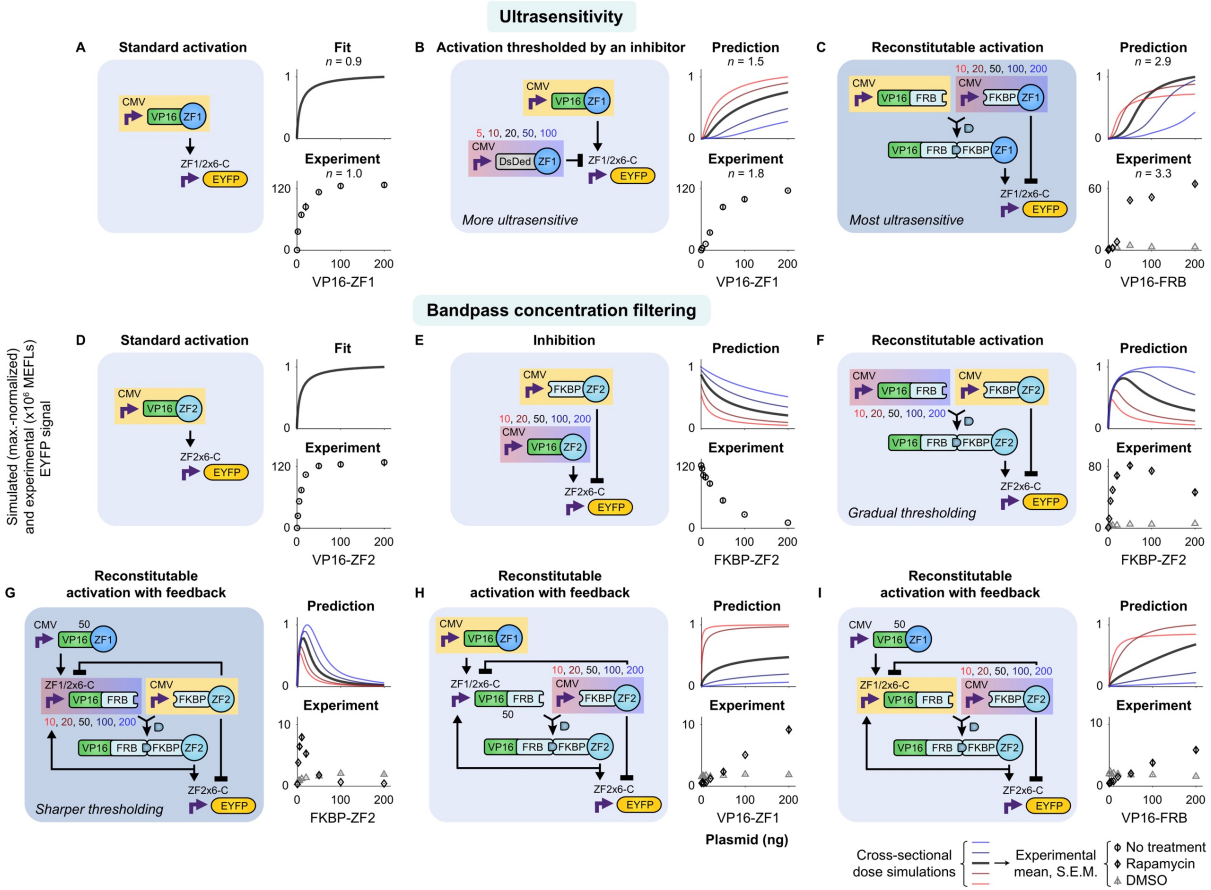

402

403

404 **Fig. 3. Analog behaviors are constructed by using TFs that play multiple roles.** Reconstitutable TFs  
405 have dose response properties that are conducive to analog signal processing. Simulated and  
406 experimentally observed responses are shown relating to **(A–C)** ultrasensitivity and **(D–I)** bandpass  
407 concentration filtering. Several designs were evaluated for the ability to meet these objectives. To  
408 implement ultrasensitivity, the Hill coefficient ( $n$ ) was most effectively increased through a strategy of  
409 removing an inhibitor in the process of producing an activator **(C)**. To implement bandpass concentration  
410 filtering, a tighter upper threshold was best achieved through a similar strategy that also included additional  
411 regulation: moderate levels of FKBP-ZF act primarily to reconstitute RaZFa, and high levels of FKBP-ZF  
412 act to inhibit the reporter and VP16-FRB **(G)**. Simulations in **A** and **D** are fitted to data, and the other panels  
413 are predictions. The prediction plots present simulations for how output gene expression varies with dose  
414 of the component highlighted in yellow; each plot includes a set of responses varying the component  
415 highlighted in red-to-blue gradation. Doses for the x-axes and above the varied component in the diagrams  
416 are in plasmid ng. Each experimental plot corresponds to the simulated condition with the dark line (for the  
417 middle dose of the varied component). The ZF1/2x6-C promoter has six partially overlapping ZF1 and ZF2  
418 sites. DMSO is the vehicle for rapamycin, which is used here as an environmental species (not an input).  
419 The simulations with RaZFa correspond to conditions with rapamycin treatment. Experiment plots represent  
420 the mean and S.E.M. of EYFP reporter signal from three biological replicates (bar graphs in **Fig. S3D–L**).

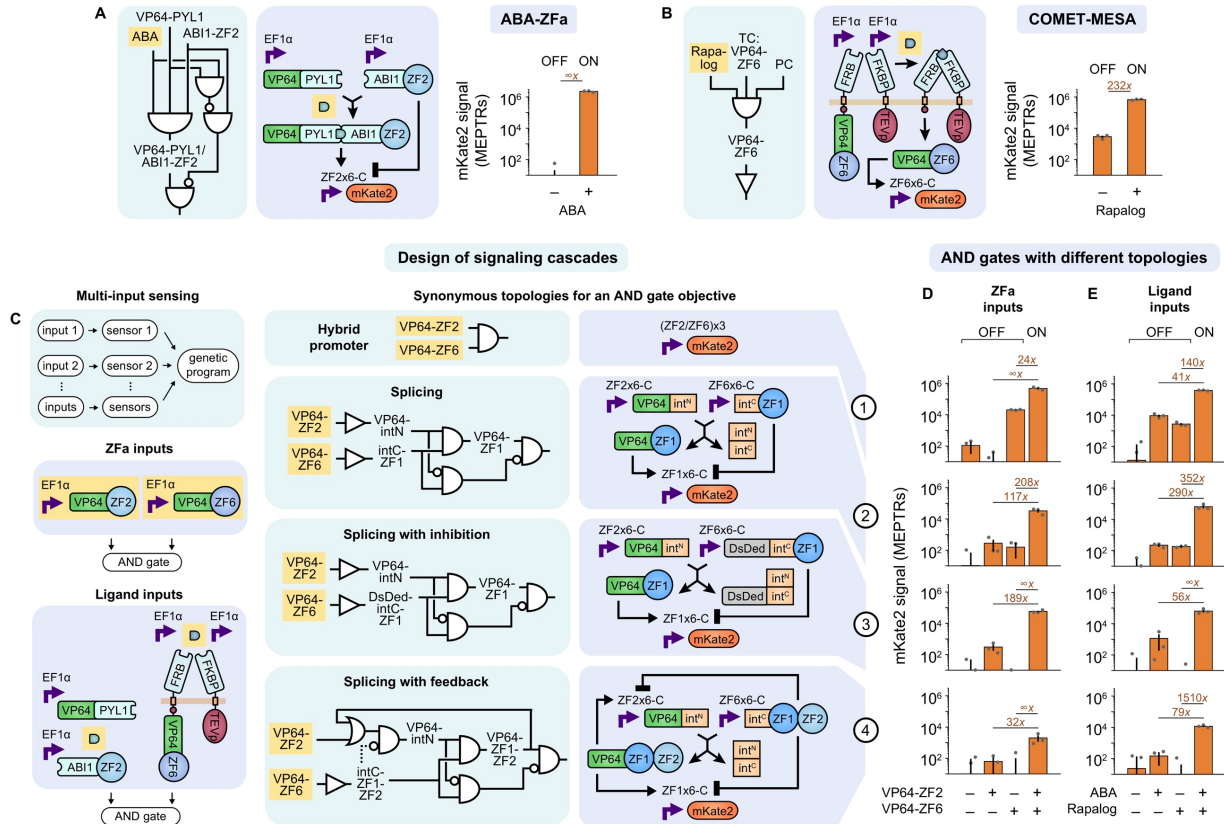

421

422 **Fig. 4. Sensors can be linked to genetic programs to make signaling cascades.** MESA and COMET  
423 technologies can be combined to construct functional biosensors, and upstream biosensor output is well-  
424 matched to the requirements for downstream promoter input. **(A,B)** ABA-ZF2a and Rapa-MESA-ZF6a each  
425 exhibit ligand-inducible signaling ( $p = 2 \times 10^{-3}$  and  $p = 1 \times 10^{-3}$ , respectively, one-tailed Welch's unpaired  $t$ -  
426 test). EtOH is the vehicle for both ligands. For MESA, the TC contains an FRB ectodomain and intracellular  
427 COMET TF, and the PC contains an FKBP ectodomain and intracellular TEV protease (TEV $\rho$ ). Each  
428 receptor chain contains an FGFR4 transmembrane domain. **(C–E)** Validated sensors were applied to  
429 implement multi-input sensing. AND logic was selected as a design goal, and four synonymous  
430 topologies—those that are intended to achieve the same goal through different mechanisms—were  
431 proposed and evaluated. For each input type (two columns for upstream ZFa or ligand sensing) and  
432 topology (four rows), reporter signal with two inputs differed from that with either or no input ( $p < 2 \times 10^{-16}$  in  
433 each case, three-factor ANOVA and Tukey's HSD test), indicating successful AND gate outcomes.  
434 Topologies 2–4 displayed negligible background signal (comparable to the signal with only the reporter  
435 present,  $\sim 10^1$ – $10^2$  MEPTRs, **Fig. S4H**), despite involving multi-layer signaling which can be a potential  
436 source of leak. The (ZF2/ZF6) $\times 3$  promoter has three pairs of alternating ZF2 and ZF6 sites. Bar graphs  
437 represent the mean, S.E.M., and values of mKate2 reporter signal from three biological replicates (depicted  
438 as dots; near-zero values are below the log-scaled  $y$ -axis lower limit). The numbers above bar pairs are the  
439 fold difference, and a fold difference of  $\infty$  indicates that the denominator signal is less than or equal to zero.

## 440 REFERENCES

- 441 1. P. Saxena *et al.*, A programmable synthetic lineage-control network that differentiates human iPSCs  
442 into glucose-sensitive insulin-secreting beta-like cells. *Nat Commun* **7**, 11247 (2016).
- 443 2. P. Guye *et al.*, Genetically engineering self-organization of human pluripotent stem cells into a liver  
444 bud-like tissue using Gata6. *Nat Commun* **7**, 10243 (2016).
- 445 3. K. T. Roybal *et al.*, Precision tumor recognition by T cells with combinatorial antigen-sensing circuits.  
446 *Cell* **164**, 770–779 (2016).
- 447 4. M. A. Fischbach, J. A. Bluestone, W. A. Lim, Cell-based therapeutics: the next pillar of medicine. *Sci*  
448 *Trans Med* **5**, 179ps177 (2013).
- 449 5. T. Kitada, B. DiAndreth, B. Teague, R. Weiss, Programming gene and engineered-cell therapies with  
450 synthetic biology. *Science* **359**, eaad1067 (2018).
- 451 6. M. Xie, M. Fussenegger, Designing cell function: assembly of synthetic gene circuits for cell biology  
452 applications. *Nat Rev Mol Cell Biol* **19**, 507–525 (2018).
- 453 7. A. L. Slusarczyk, A. Lin, R. Weiss, Foundations for the design and implementation of synthetic genetic  
454 circuits. *Nat Rev Genet* **13**, 406–420 (2012).
- 455 8. F. Lienert, J. J. Lohmueller, A. Garg, P. A. Silver, Synthetic biology in mammalian cells: next generation  
456 research tools and therapeutics. *Nat Rev Mol Cell Biol* **15**, 95–107 (2014).
- 457 9. A. A. K. Nielsen *et al.*, Genetic circuit design automation. *Science* **352**, aac7341 (2016).
- 458 10. Y. Chen *et al.*, Genetic circuit design automation for yeast. *Nat Microbiol*, (2020).
- 459 11. C. J. Bashor *et al.*, Complex signal processing in synthetic gene circuits using cooperative regulatory  
460 assemblies. *Science* **364**, 593–597 (2019).
- 461 12. J. J. Lohmueller, T. Z. Armel, P. A. Silver, A tunable zinc finger-based framework for Boolean logic  
462 computation in mammalian cells. *Nucleic Acids Res* **40**, 5180–5187 (2012).
- 463 13. P. S. Donahue *et al.*, The COMET toolkit for composing customizable genetic programs in mammalian  
464 cells. *Nat Commun* **11**, 779 (2020).
- 465 14. F. Lienert *et al.*, Two- and three-input TALE-based AND logic computation in embryonic stem cells.  
466 *Nucleic Acids Res* **41**, 9967–9975 (2013).
- 467 15. R. Gaber *et al.*, Designable DNA-binding domains enable construction of logic circuits in mammalian  
468 cells. *Nat Chem Biol* **10**, 203–208 (2014).
- 469 16. T. Lebar, A. Verbič, A. Ljubetič, R. Jerala, Polarized displacement by transcription activator-like  
470 effectors for regulatory circuits. *Nat Chem Biol* **15**, 80–87 (2018).
- 471 17. Z. Chen *et al.*, De novo design of protein logic gates. *Science* **368**, 78–84 (2020).
- 472 18. D. Ma, S. Peng, Z. Xie, Integration and exchange of split dCas9 domains for transcriptional controls in  
473 mammalian cells. *Nat Commun* **7**, 13056 (2016).
- 474 19. H. Kim, D. Bojar, M. Fussenegger, A CRISPR/Cas9-based central processing unit to program complex  
475 logic computation in human cells. *Proc Natl Acad Sci USA* **116**, 7214–7219 (2019).



- 476 20. B. Angelici, E. Mailand, B. Haefliger, Y. Benenson, Synthetic biology platform for sensing and  
477 integrating endogenous transcriptional inputs in mammalian cells. *Cell Rep* **16**, 2525–2537 (2016).
- 478 21. S. Ausländer, D. Ausländer, M. Müller, M. Wieland, M. Fussenegger, Programmable single-cell  
479 mammalian biocomputers. *Nature* **487**, 123–127 (2012).
- 480 22. X. J. Gao, L. S. Chong, M. S. Kim, M. B. Elowitz, Programmable protein circuits in living cells. *Science*  
481 **361**, 1252–1258 (2018).
- 482 23. T. Fink *et al.*, Design of fast proteolysis-based signaling and logic circuits in mammalian cells. *Nat*  
483 *Chem Biol* **15**, 115–122 (2018).
- 484 24. Z. Kis, H. S. Pereira, T. Homma, R. M. Pedrigi, R. Krams, Mammalian synthetic biology: emerging  
485 medical applications. *J R Soc Interface* **12**, 20141000 (2015).
- 486 25. N. Davidsohn *et al.*, Accurate predictions of genetic circuit behavior from part characterization and  
487 modular composition. *ACS Synth Biol* **4**, 673–681 (2014).
- 488 26. C. Briat, A. Gupta, M. Khammash, Antithetic integral feedback ensures robust perfect adaptation in  
489 noisy biomolecular networks. *Cell Syst* **2**, 15–26 (2016).
- 490 27. D. Del Vecchio, H. Abdallah, Y. Qian, J. J. Collins, A blueprint for a synthetic genetic feedback  
491 controller to reprogram cell fate. *Cell Syst* **4**, 109–120 (2017).
- 492 28. G. Lillacci, Y. Benenson, M. Khammash, Synthetic control systems for high performance gene  
493 expression in mammalian cells. *Nucleic Acids Res* **46**, 9855–9863 (2018).
- 494 29. M. Vila-Perelló, T. W. Muir, Biological applications of protein splicing. *Cell* **143**, 191–200 (2010).
- 495 30. P. Carvajal-Vallejos, R. Pallissé, H. D. Mootz, S. R. Schmidt, Unprecedented rates and efficiencies  
496 revealed for new natural split inteins from metagenomic sources. *J Biol Chem* **287**, 28686–28696  
497 (2012).
- 498 31. G. S. Baird, D. A. Zacharias, R. Y. Tsien, Biochemistry, mutagenesis, and oligomerization of DsRed,  
499 a red fluorescent protein from coral. *Proc Natl Acad Sci USA* **97**, 11984–11989 (2000).
- 500 32. R. M. Hartfield, K. A. Schwarz, J. J. Muldoon, N. Bagheri, J. N. Leonard, Multiplexing engineered  
501 receptors for multiparametric evaluation of environmental ligands. *ACS Synth Biol* **6**, 2042–2055  
502 (2017).
- 503 33. S. Hooshangi, S. Thiberge, R. Weiss, Ultrasensitivity and noise propagation in a synthetic  
504 transcriptional cascade. *Proc Natl Acad Sci USA* **102**, 3581–3586 (2005).
- 505 34. S. Kiani *et al.*, CRISPR transcriptional repression devices and layered circuits in mammalian cells. *Nat*  
506 *Methods* **11**, 723–726 (2014).
- 507 35. N. Lapique, Y. Benenson, Genetic programs can be compressed and autonomously decompressed in  
508 live cells. *Nat Nanotech* **13**, 309–315 (2018).
- 509 36. J. Beal, T. Lu, R. Weiss, Automatic compilation from high-level biologically-oriented programming  
510 language to genetic regulatory networks. *PLoS One* **6**, e22490 (2011).
- 511 37. E. C. O'Shaughnessy, S. Palani, J. J. Collins, C. A. Sarkar, Tunable signal processing in synthetic  
512 MAP kinase cascades. *Cell* **144**, 119–131 (2011).



- 513 38. T. Shopera *et al.*, Robust, tunable genetic memory from protein sequestration combined with positive  
514 feedback. *Nucleic Acids Res* **43**, 9086–9094 (2015).
- 515 39. Q. Zhang, S. Bhattacharya, M. E. Andersen, Ultrasensitive response motifs: basic amplifiers in  
516 molecular signalling networks. *Open Biol* **3**, 130031 (2013).
- 517 40. D. Greber, M. Fussenegger, An engineered mammalian band-pass network. *Nucleic Acids Res* **38**,  
518 e174 (2010).
- 519 41. N. S. Scholes, M. Isalan, A three-step framework for programming pattern formation. *Curr Opin Chem*  
520 *Biol* **40**, 1–7 (2017).
- 521 42. Y.-H. Wang, K. Y. Wei, C. D. Smolke, Synthetic biology: advancing the design of diverse genetic  
522 systems. *Annu Rev Chem Biomol Eng* **4**, 69–102 (2013).
- 523 43. Y. Gao *et al.*, Complex transcriptional modulation with orthogonal and inducible dCas9 regulators. *Nat*  
524 *Methods* **13**, 1043–1049 (2016).
- 525 44. N. M. Daringer, R. M. Dudek, K. A. Schwarz, J. N. Leonard, Modular extracellular sensor architecture  
526 for engineering mammalian cell-based devices. *ACS Synth Biol* **3**, 892–902 (2014).
- 527 45. K. A. Schwarz, N. M. Daringer, T. B. Dolberg, J. N. Leonard, Rewiring human cellular input–output  
528 using modular extracellular sensors. *Nat Chem Biol* **13**, 202–209 (2017).
- 529 46. H. I. Edelstein *et al.*, Elucidation and refinement of synthetic receptor mechanisms. *Synth Biol*, (In  
530 press).
- 531 47. T. B. Dolberg *et al.*, Computation-guided optimization of split protein systems. *bioRxiv*, (2019).
- 532 48. Y. Hart, U. Alon, The utility of paradoxical components in biological circuits. *Mol Cell* **49**, 213–221  
533 (2013).
- 534 49. A. V. Anzalone *et al.*, Search-and-replace genome editing without double-strand breaks or donor DNA.  
535 *Nature* **576**, 149–157 (2019).
- 536 50. J. J. Muldoon. (Zenodo, <https://zenodo.org/record/4013993>, 2020).  
537
